# Supplementary material for: Three and four coordinate Fe carbodiphosphorane complexes
Source: Royal Society of Chemistry journal article supplement (doi:10.1039/c6dt03453e), 2016-01-01
Supplement: c6dt03453e1.pdf [file c6dt03453e1.pdf]

Supporting information for:

## Three and Four Coordinate Fe Carbodiphosphorane Complexes

Conor Prankevicius,<sup>a</sup> Diana Iovan,<sup>b</sup> and Douglas W. Stephan<sup>a</sup>

### Table of contents

|                                                              |          |
|--------------------------------------------------------------|----------|
| <sup>1</sup> H NMR (CD <sub>2</sub> Cl <sub>2</sub> ) of [2] | S1       |
| <sup>57</sup> Fe Mossbauer spectra of [2]                    | S2       |
| <sup>1</sup> H NMR of [2] dissolved in CDCl <sub>3</sub>     | S3       |
| X-band EPR spectrum of [2] in CDCl <sub>3</sub>              | S4       |
| <sup>1</sup> H NMR (THF-d <sup>8</sup> ) of [3]              | S5       |
| <sup>1</sup> H NMR (C <sub>6</sub> D <sub>6</sub> ) of [4]   | S6       |
| <sup>1</sup> H NMR (C <sub>6</sub> D <sub>6</sub> ) of [5]   | S7       |
| Crystallographic Information                                 | S8 – S10 |

[2] <sup>1</sup>H NMR(CD<sub>2</sub>Cl<sub>2</sub>)

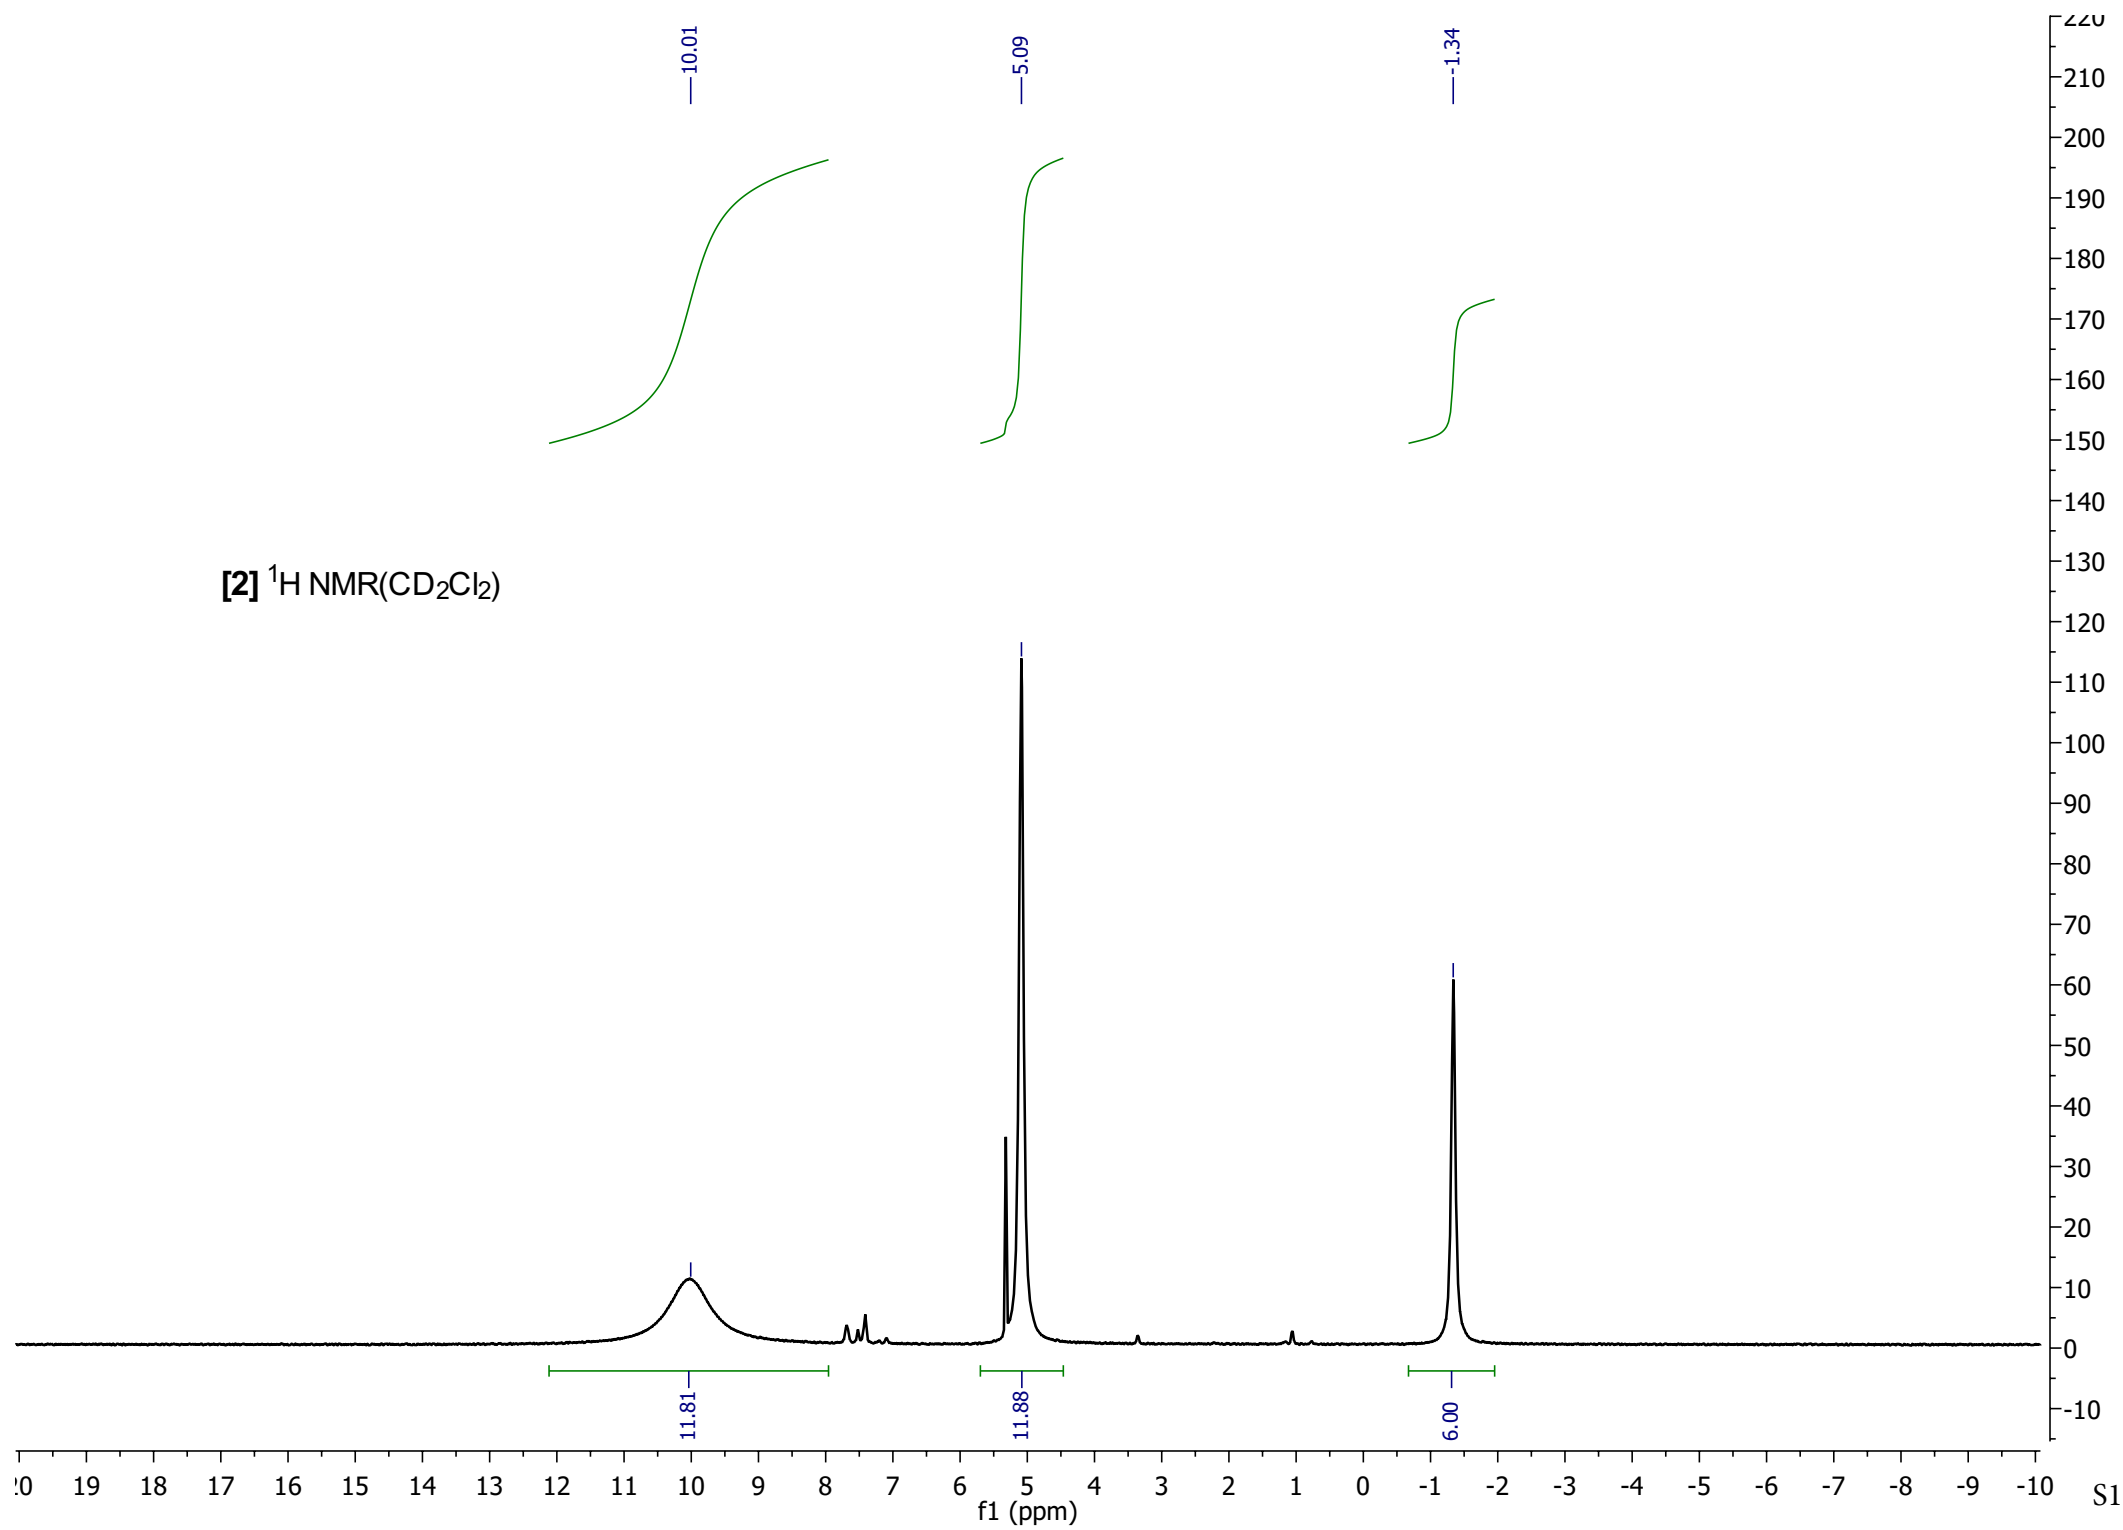

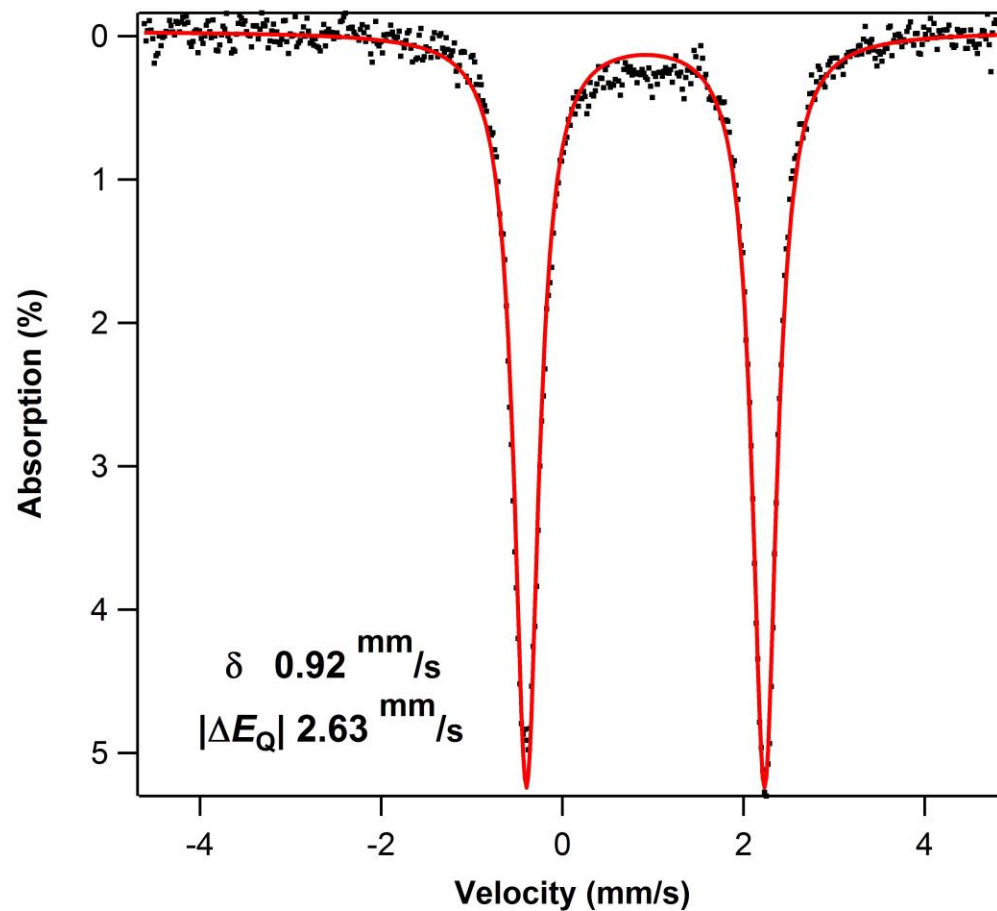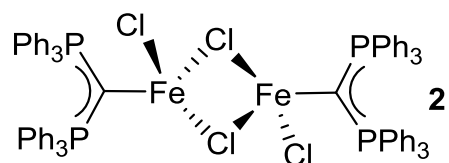

$^{57}\text{Fe}$  Mössbauer spectrum was collected at 90K on a constant acceleration spectrometer (SEE Co, Minneapolis, MN). Isomer shifts are reported relative to Fe foil at room temperature. Data was analyzed and simulated using the Igor Pro 6 software (WaveMetrics, Portland, OR) with Lorentzian fitting functions. The sample (30 mg) was suspended in Paratone oil and immobilized by rapid freezing in liquid nitrogen

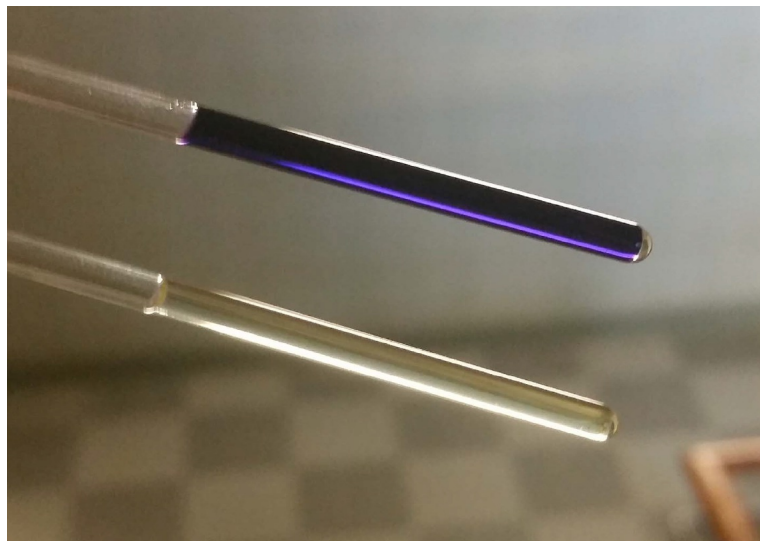

[2] in CDCl<sub>3</sub>

[2] in CD<sub>2</sub>Cl<sub>2</sub>

[2] + CDCl<sub>3</sub>  
<sup>1</sup>H NMR (CDCl<sub>3</sub>):

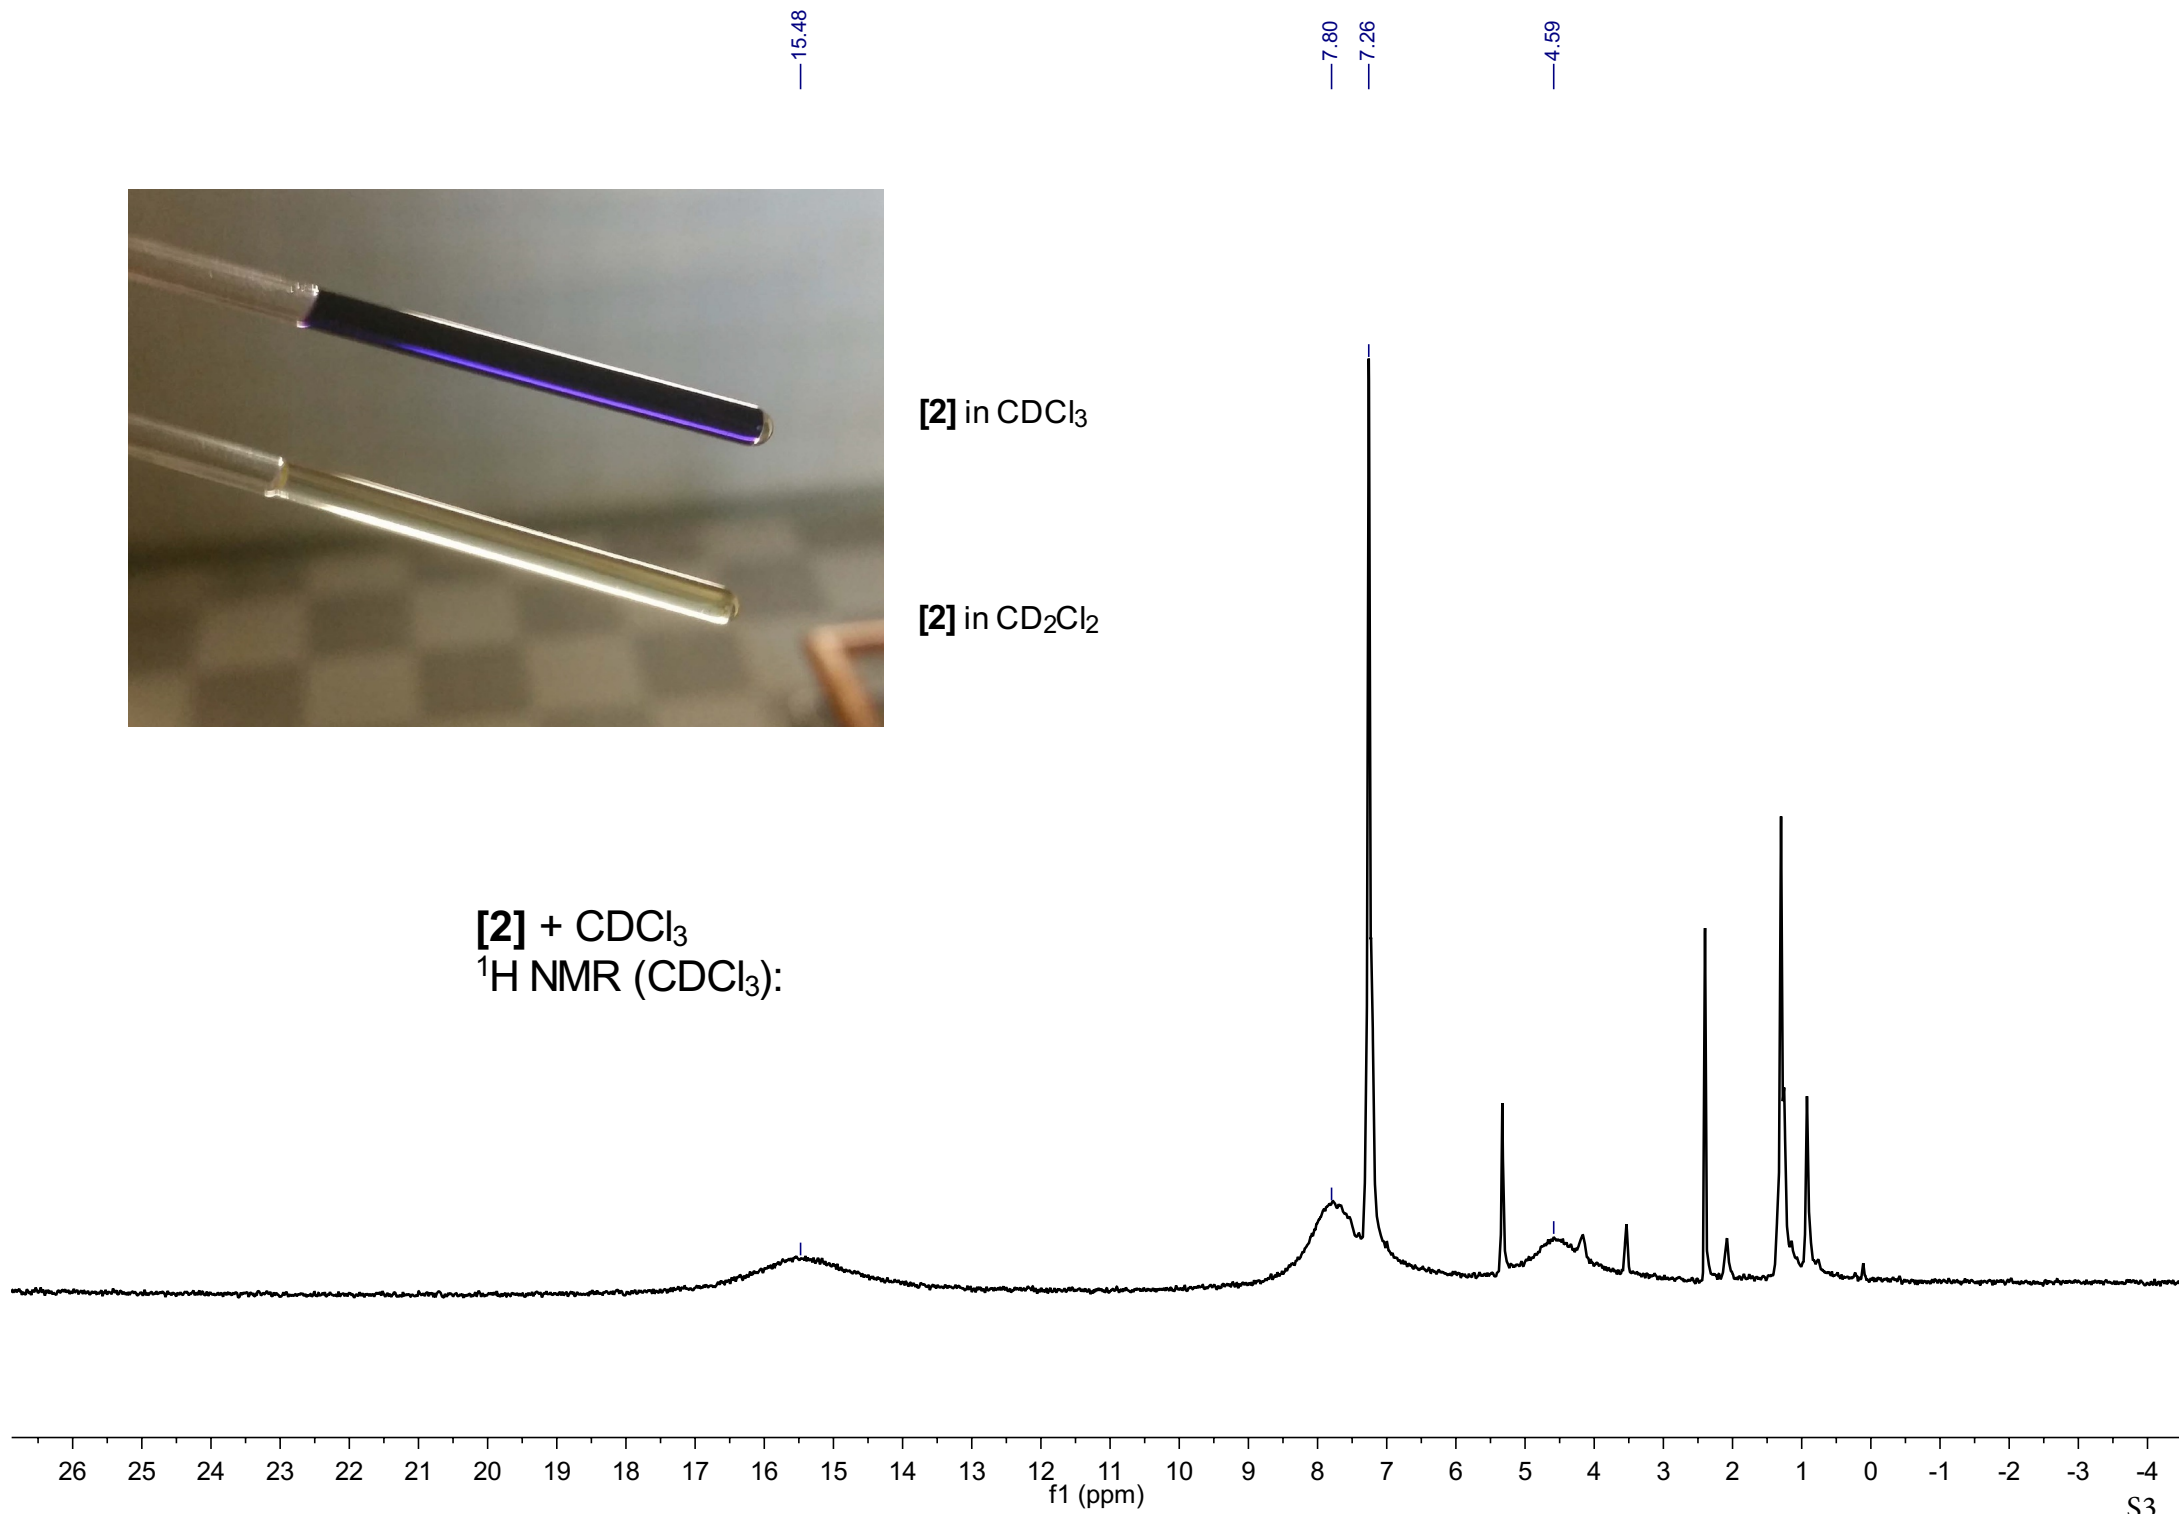

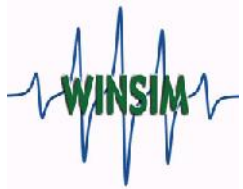

Spectral Parameters:

|                           |                         |
|---------------------------|-------------------------|
| Field Center: 2047.875 G  | Time Constant: 0.010000 |
| Scan Range: 4095.750 G    | Rec. Gain: 632.455505   |
| Data Points: 16384        | MW Freq.: 9.387916 GHz  |
| Mod. Amp.: 4.000000 G     | MW Power: 0.542300 mw   |
| Mod. Freq: 100.000000 KHz |                         |

Comment: [2] in frozen CDCl<sub>3</sub> at 50K

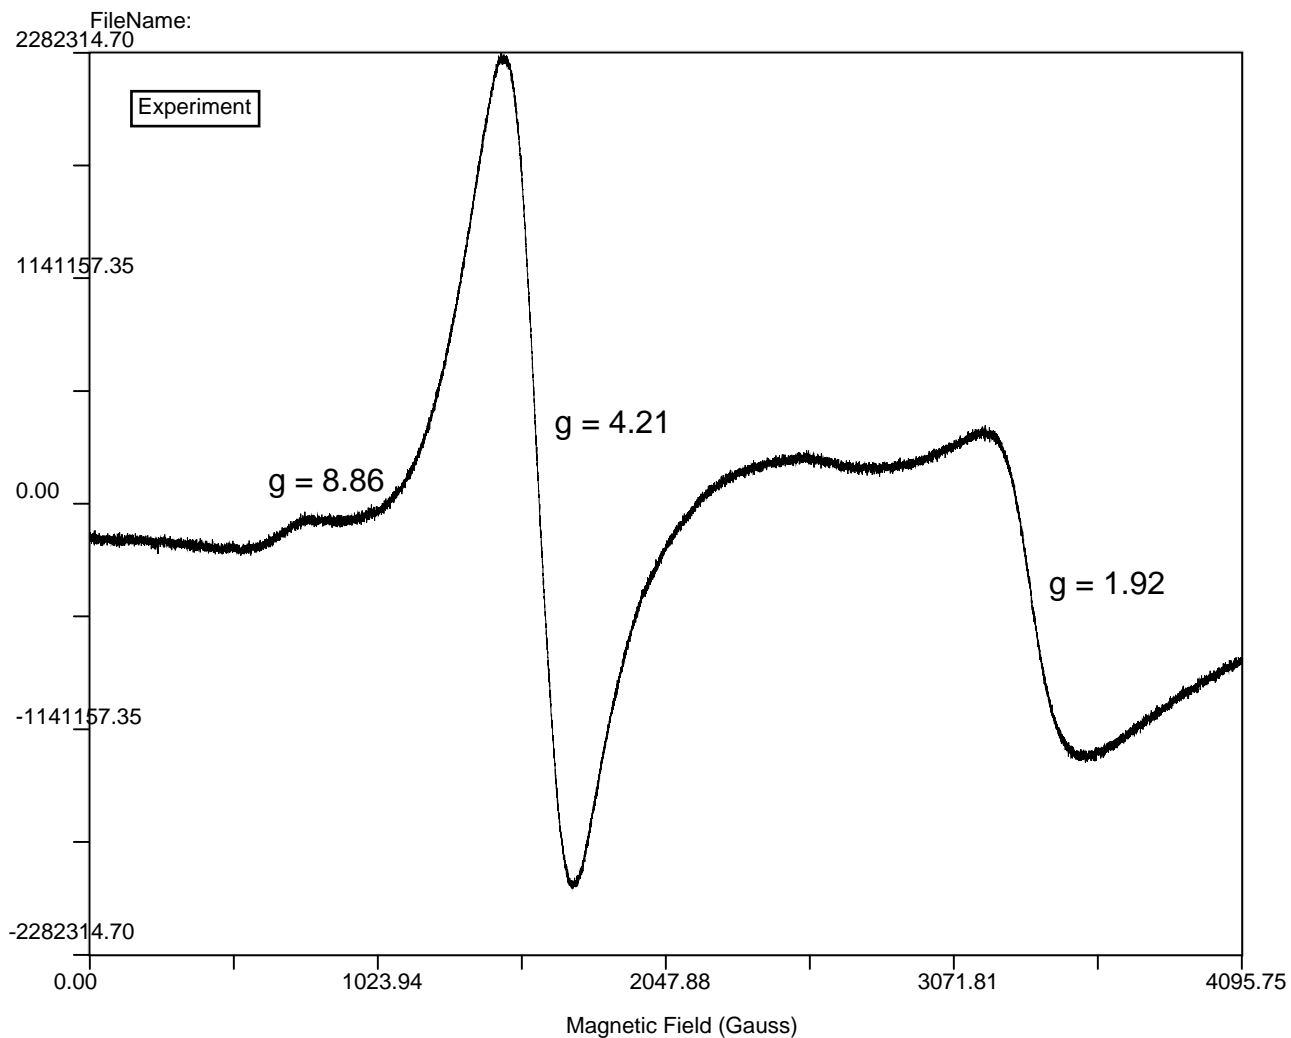

[3]  $^1\text{H}$  NMR (THF- $\text{d}^8$ ):

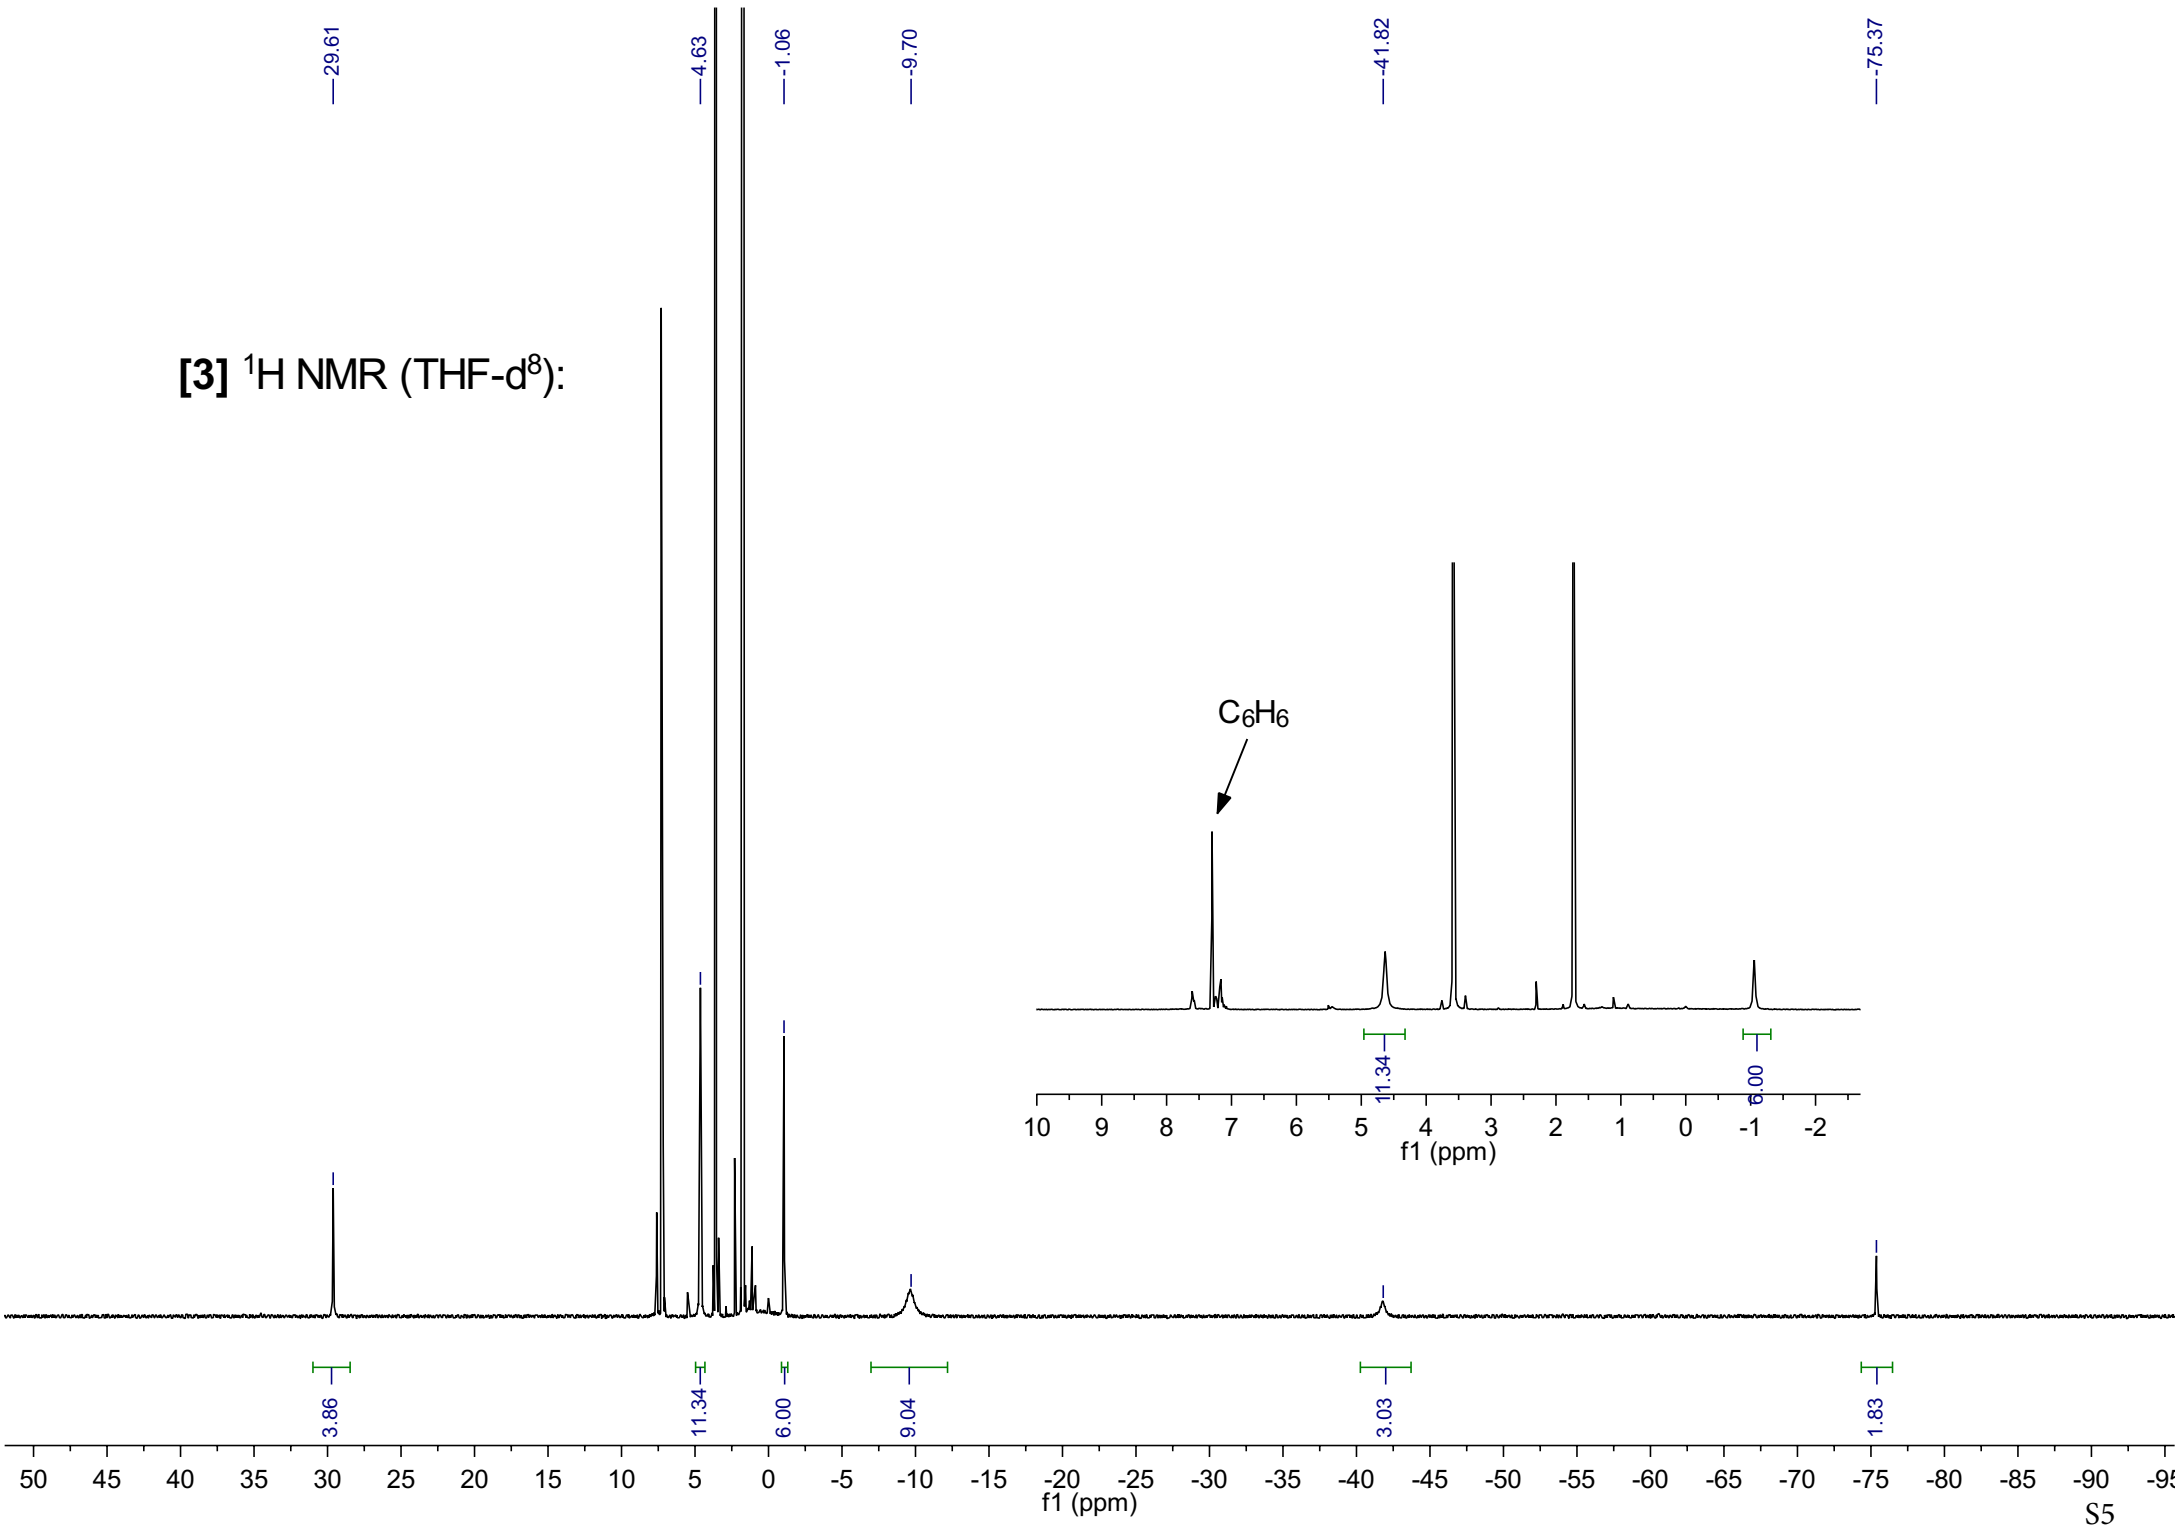

[4]  $^1\text{H}$  NMR ( $\text{C}_6\text{D}_6$ ):

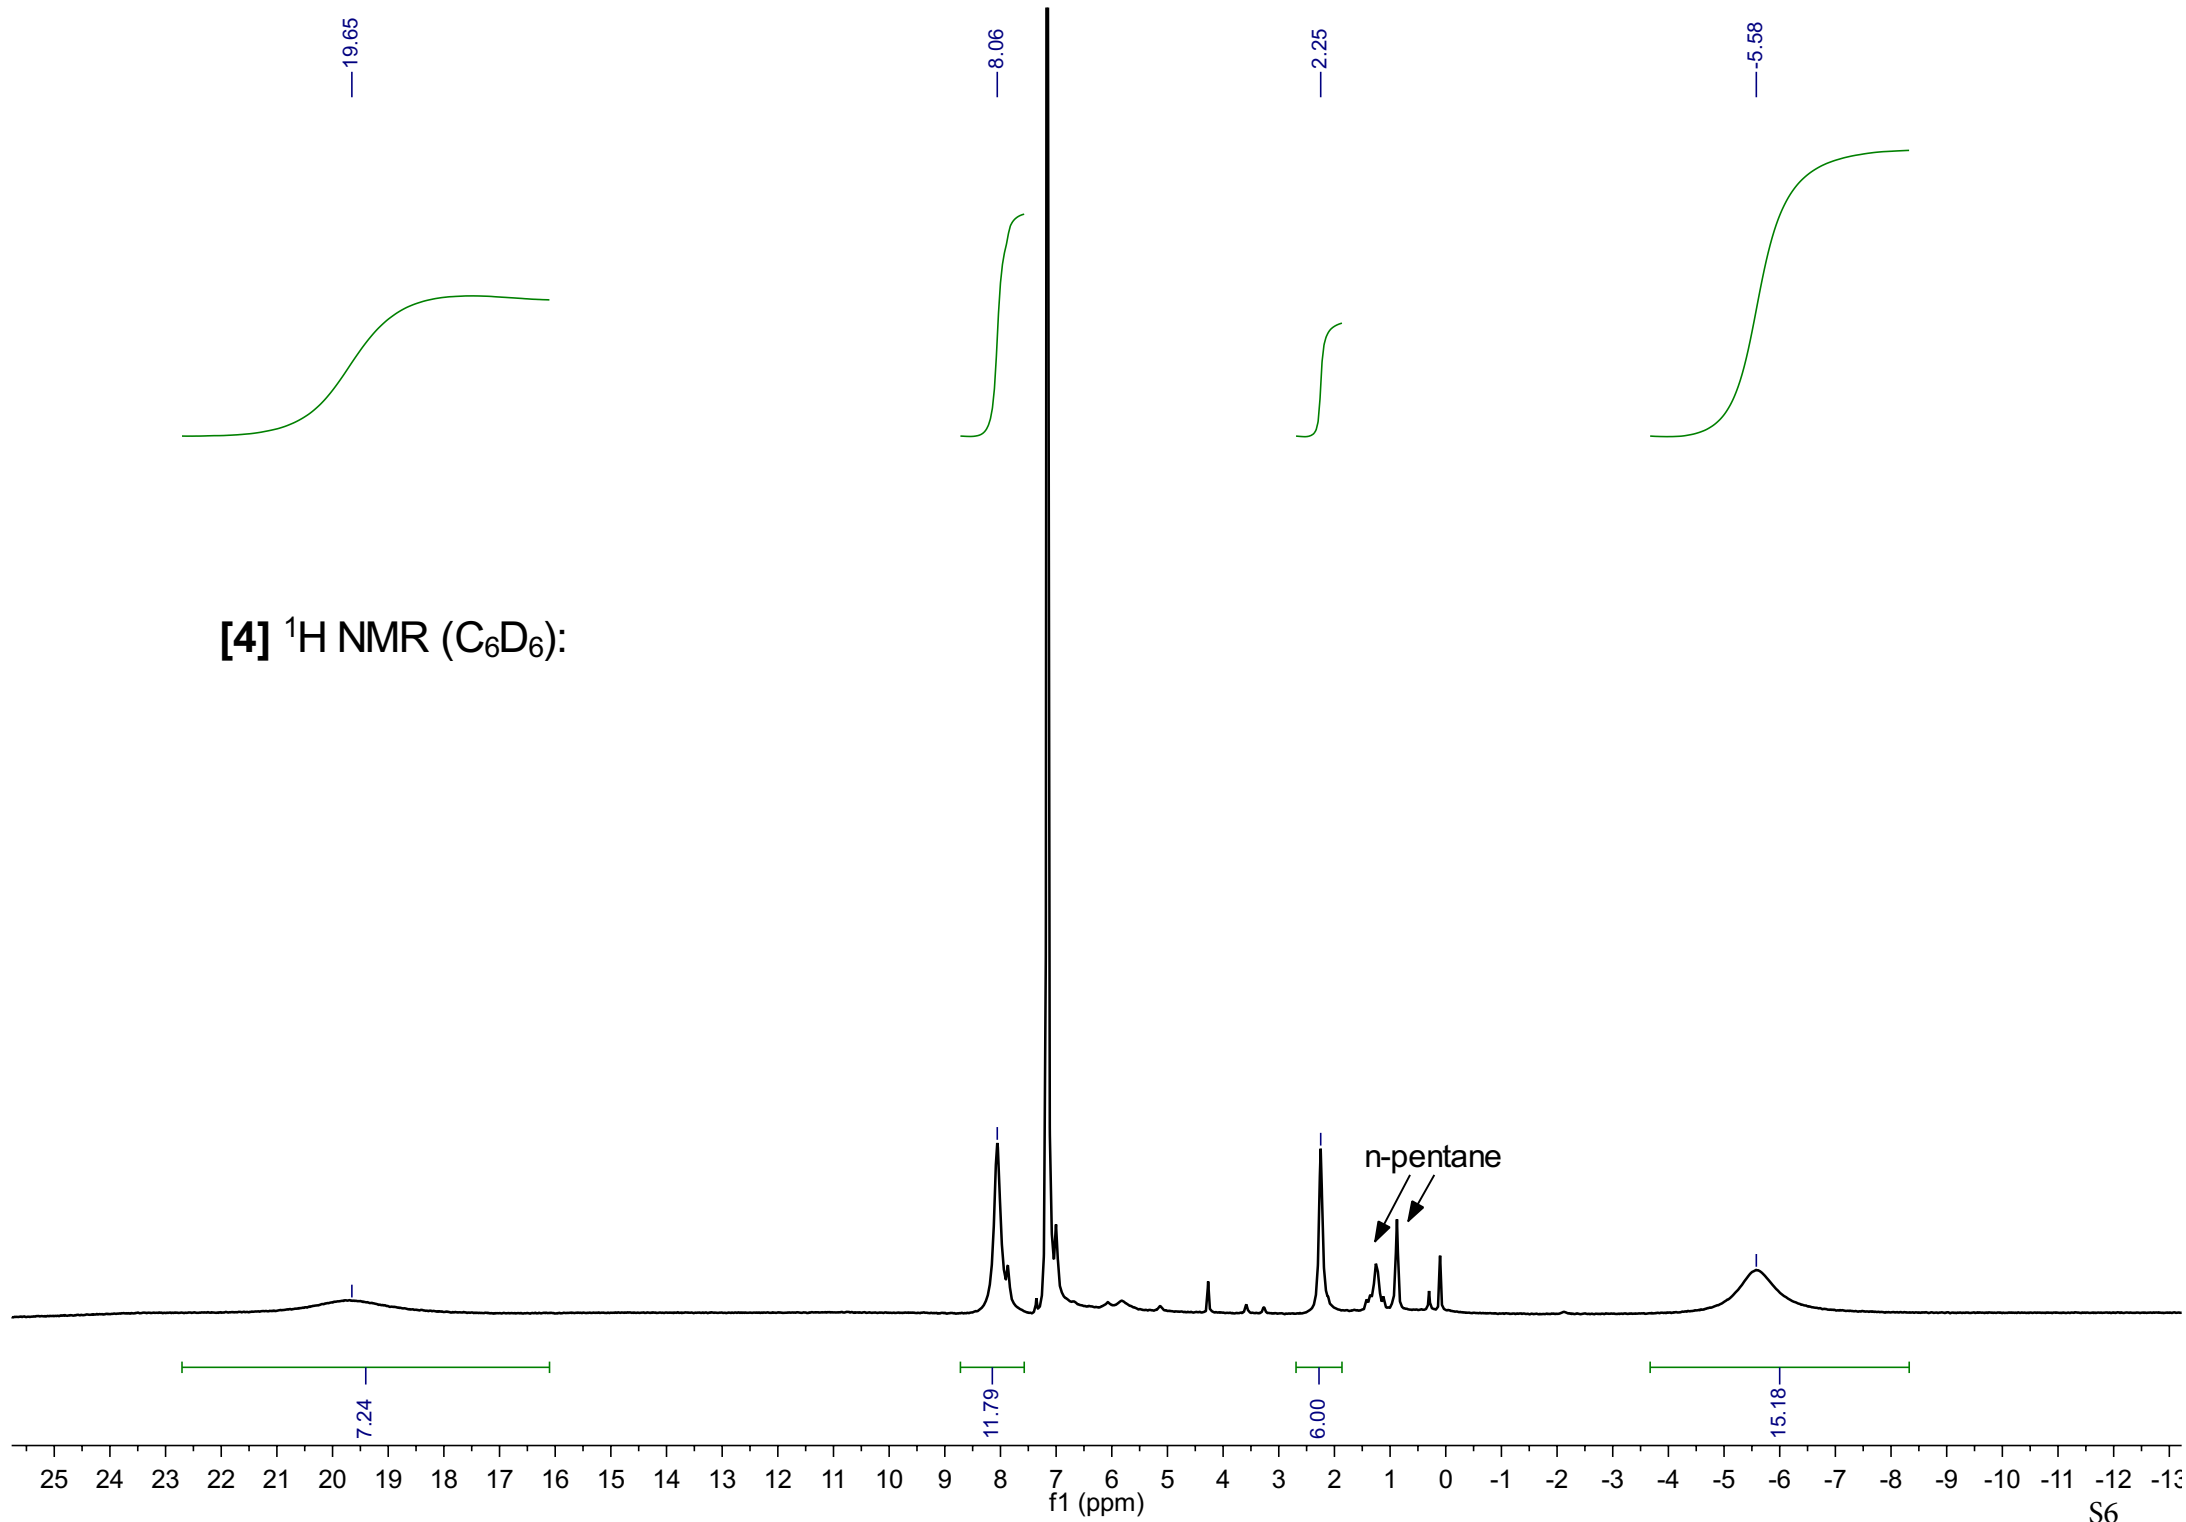

[5]  $^1\text{H}$  NMR ( $\text{C}_6\text{D}_6$ ):

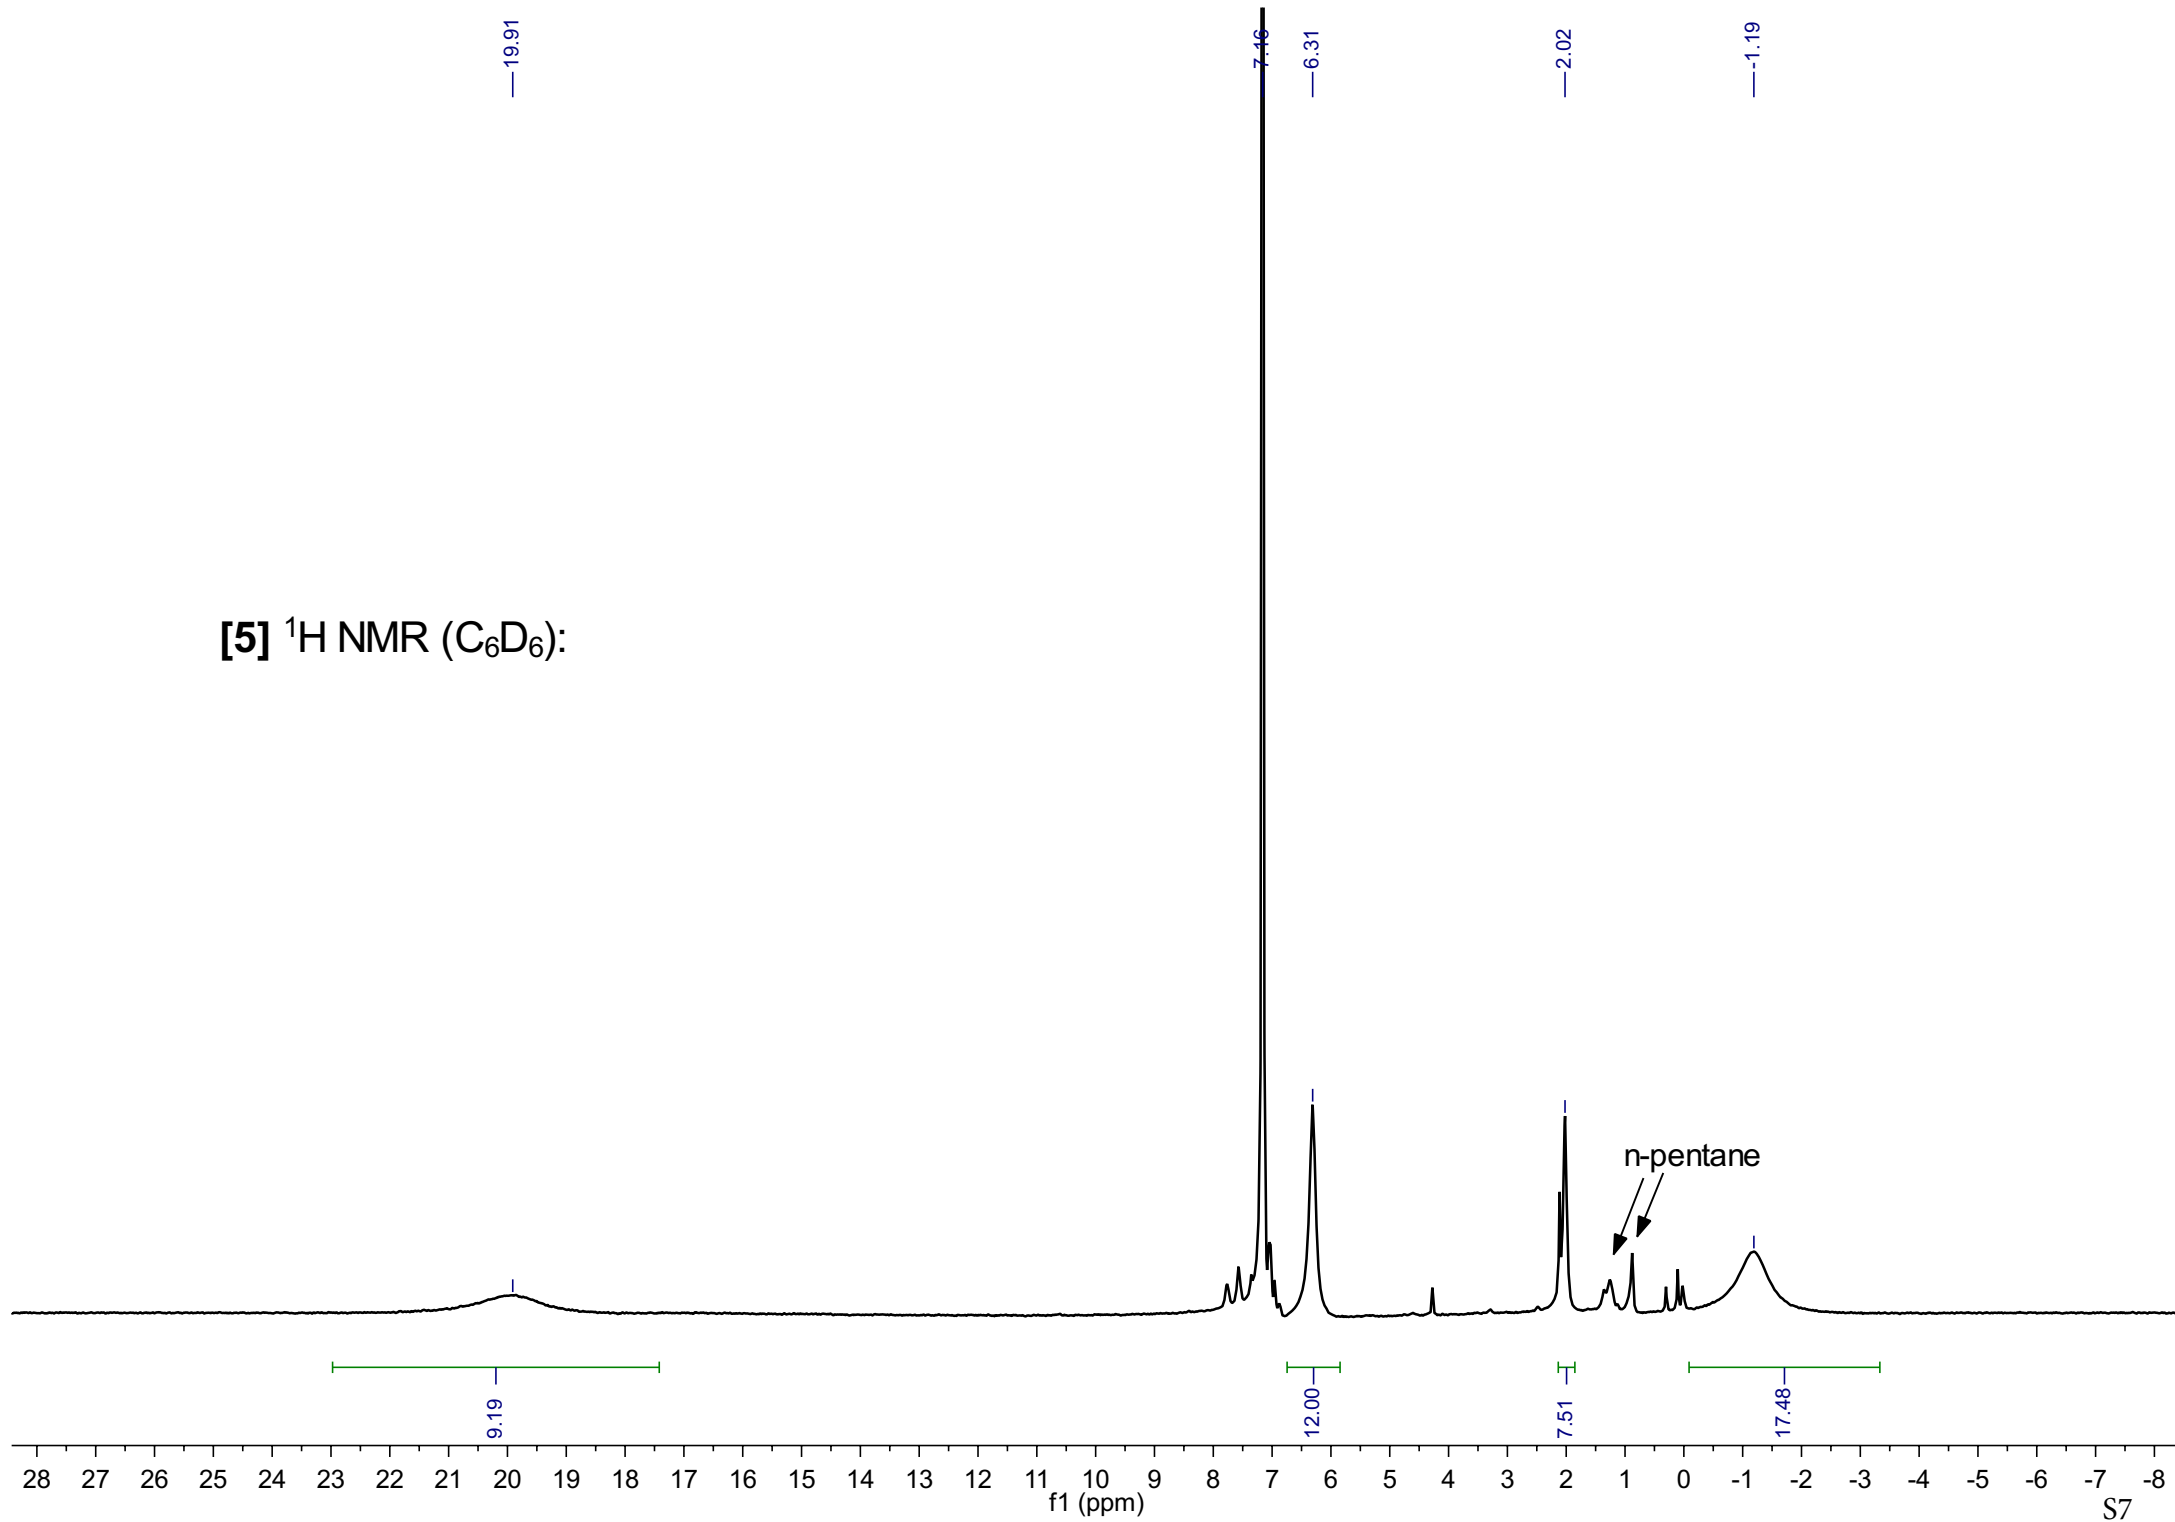



**X-ray Data Collection and Reduction.** Crystals were coated in Paratone-N oil in the glovebox, mounted on a MiTegen Micromount, and placed under a N<sub>2</sub> stream, thus maintaining a dry, O<sub>2</sub>-free environment for each crystal. The data were collected on a Bruker Kappa Apex II diffractometer using a graphite monochromator with Mo K $\alpha$  ( $\lambda = 0.71073 \text{ \AA}$ ) radiation. The data were collected at 150(2) K for all crystals. The frames were integrated with the Bruker SAINT software package using a narrow-frame algorithm. Data were corrected for absorption effects using the empirical multiscan method SADABS. In cases where non-merohedral twinning was detected, the data was indexed with CELLNOW to determine the contributions of the respective crystal domains, and the data were corrected for absorption effects using TWINABS. The heavy atom positions were determined employing the SHELXTL direct methods routine. The remaining non-hydrogen atoms were located from successive difference Fourier map calculations. The refinements were carried out by using full-matrix least squares techniques on F, minimizing the function  $\omega (F_o - F_c)^2$  where the weight  $\omega$  is defined as  $4F_o^2/2\sigma (F_o^2)$  and  $F_o$  and  $F_c$  are the observed and calculated structure factor amplitudes, respectively. In the final cycles of each refinement, all non-hydrogen atoms were assigned anisotropic temperature factors in the absence of positional disordering. The final models of twinned structures were obtained by refinement against the twinned data. C-H atom positions were calculated and allowed to ride on the carbon to which they are bonded assuming a C-H bond length of 0.95  $\text{\AA}$ . H-atom temperature factors were fixed at 1.20 times the isotropic temperature factor of the C-atom to which they are bonded. The H-atom contributions were calculated, but not refined. The locations of the largest peaks in the final difference Fourier map calculation as well as the magnitude of the residual electron densities in each case were of no chemical significance.

|                                            | <b>[2] (monomer +<br/>dimer)</b>                                                                  | <b>[2] (dimer only)</b>                                                        | <b>[3]</b>                                        |
|--------------------------------------------|---------------------------------------------------------------------------------------------------|--------------------------------------------------------------------------------|---------------------------------------------------|
| Formula                                    | C <sub>76.5</sub> H <sub>66</sub> Cl <sub>5</sub> Fe <sub>2</sub> O <sub>0.5</sub> P <sub>4</sub> | C <sub>74</sub> H <sub>60</sub> Cl <sub>4</sub> Fe <sub>2</sub> P <sub>4</sub> | C <sub>55</sub> H <sub>52</sub> FeOP <sub>2</sub> |
| wt                                         | 1406.12                                                                                           | 1326.60                                                                        | 846.76                                            |
| Cryst. syst.                               | Triclinic                                                                                         | Triclinic                                                                      | Monoclinic                                        |
| Space group                                | P $\bar{1}$                                                                                       | P $\bar{1}$                                                                    | P21/c                                             |
| a(Å)                                       | 14.084(2)                                                                                         | 11.3479(10)                                                                    | 11.1700(11)                                       |
| b(Å)                                       | 15.641(2)                                                                                         | 16.1979(15)                                                                    | 23.928(2)                                         |
| c(Å)                                       | 17.663(3)                                                                                         | 17.6503(17)                                                                    | 17.1484(16)                                       |
| $\alpha$ (deg)                             | 116.156(7)                                                                                        | 79.585(4)                                                                      | 90                                                |
| $\beta$ (deg)                              | 90.164(8)                                                                                         | 88.787(4)                                                                      | 106.051(5)                                        |
| $\gamma$ (deg)                             | 90.169(8)                                                                                         | 86.895(4)                                                                      | 90                                                |
| V(Å <sup>3</sup> )                         | 3492.3(9)                                                                                         | 3196.0(5)                                                                      | 4404.6(7)                                         |
| Z                                          | 2                                                                                                 | 2                                                                              | 4                                                 |
| d(calc) gcm <sup>-3</sup>                  | 1.337                                                                                             | 1.383                                                                          | 1.277                                             |
| Radiation                                  | Mo K $\alpha$                                                                                     | Mo K $\alpha$                                                                  | Mo K $\alpha$                                     |
| R(int)                                     | 0.0559                                                                                            | 0.0269                                                                         | 0.1865                                            |
| $\mu$ , mm <sup>-1</sup>                   | 0.741                                                                                             | 0.767                                                                          | 0.455                                             |
| Total data                                 | 54410                                                                                             | 67951                                                                          | 53935                                             |
| >2 $\sigma$ (F <sub>o</sub> <sup>2</sup> ) | 12042                                                                                             | 14591                                                                          | 7850                                              |
| Variables                                  | 806                                                                                               | 757                                                                            | 532                                               |
| R (>2 $\sigma$ )                           | 0.0716                                                                                            | 0.0270                                                                         | 0.0795                                            |
| R <sub>w</sub>                             | 0.2074                                                                                            | 0.0715                                                                         | 0.1829                                            |
| GOOF                                       | 1.050                                                                                             | 1.023                                                                          | 1.022                                             |

| <b>[5]</b>                        |                                                                                     |
|-----------------------------------|-------------------------------------------------------------------------------------|
| Formula                           | C <sub>44</sub> H <sub>48</sub> F <sub>3</sub> FeNO <sub>3</sub> P <sub>2</sub> SSi |
| wt                                | 901.86                                                                              |
| Cryst. syst.                      | Monoclinic                                                                          |
| Space group                       | P2 <sub>1</sub> /n                                                                  |
| a(Å)                              | 11.2805(11)                                                                         |
| b(Å)                              | 19.2156(16)                                                                         |
| c(Å)                              | 21.726(2)                                                                           |
| α(deg)                            | 90                                                                                  |
| β(deg)                            | 103.818(4)                                                                          |
| γ(deg)                            | 90                                                                                  |
| V(Å <sup>3</sup> )                | 4573.1(7)                                                                           |
| Z                                 | 4                                                                                   |
| d(calc) gcm <sup>-3</sup>         | 1.310                                                                               |
| Radiation                         | Mo Kα                                                                               |
| R(int)                            | 0.0716                                                                              |
| μ, mm <sup>-1</sup>               | 0.548                                                                               |
| Total data                        | 52032                                                                               |
| >2σ(F <sub>o</sub> <sup>2</sup> ) | 10473                                                                               |
| Variables                         | 514                                                                                 |
| R (>2σ)                           | 0.0604                                                                              |
| R <sub>w</sub>                    | 0.1753                                                                              |
| GOOF                              | 1.029                                                                               |
